# Supplementary material
Source: PubMed Central journal article supplement (PMC3689162)
Supplement: Supp_Fig1.pdf [file Supp_Fig1.pdf]

## Supplementary Data

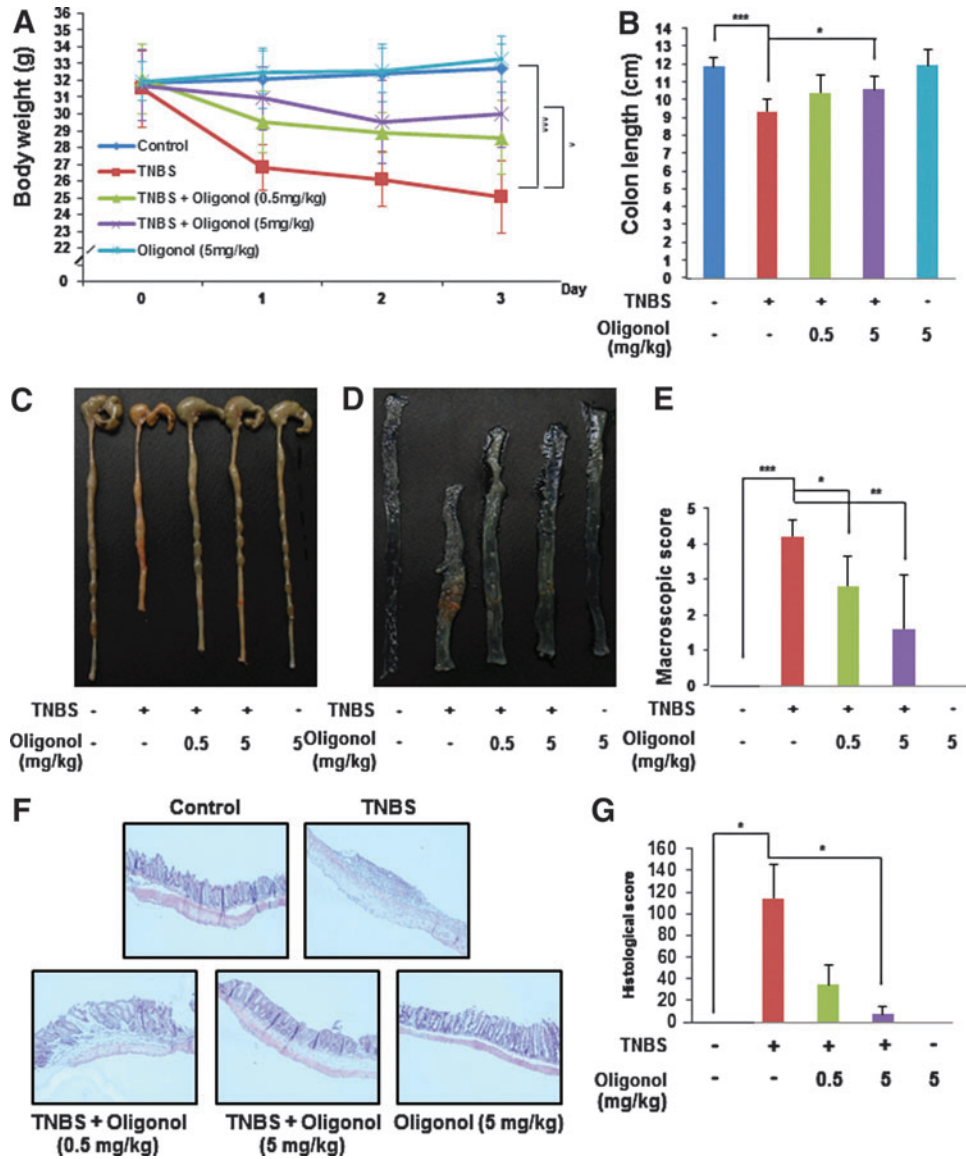

**SUPPLEMENTARY FIG. S1.** Oligonol ameliorated pathological symptoms in a mouse trinitrobenzene sulfonic acid (TNBS)-induced colitis model. (A) Gradual changes of body weight during TNBS administration in mice. (B) The comparison of the colon length at day 3. (C) A representative photograph of the mouse colon in each group. (D) Macroscopic view of the mouse colon in each group. (E) Macroscopic disease score. (F) Representative distal colon sections stained with hematoxylin and eosin (H&E). Magnifications  $\times 100$ . (G) Histologic inflammatory score. Results are expressed as means  $\pm$  SD ( $n=5$ , in each group). \* $p < 0.05$ , \*\* $p < 0.01$ , and \*\*\* $p < 0.001$ .
