# Supplementary material
Source: PubMed Central journal article supplement (PMC3689162)
Supplement: Supp_Fig2.pdf [file Supp_Fig2.pdf]

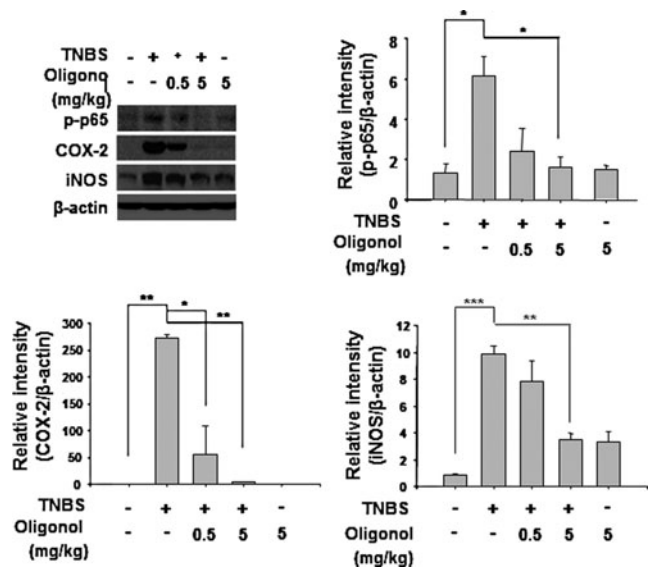

SUPPLEMENTARY FIG. S2. Oligonol inhibited TNBS-induced activation of NF-κB and its target protein expression in mouse colon. p-p65 (Ser536), COX-2, and iNOS levels in the supernatants of colon strips of control mice, TNBS-treated mice, oligonol (0.5 mg/kg)+TNBS-treated mice, oligonol (5 mg/kg)+TNBS-treated mice, and oligonol-treated mice ( $n=5$ , in each group). Data are expressed as means  $\pm$  SE. \* $p < 0.05$ , \*\* $p < 0.01$ , and \*\*\* $p < 0.001$ .
