# Supplementary material
Source: PubMed Central journal article supplement (PMC3689162)
Supplement: Supp_Fig3.pdf [file Supp_Fig3.pdf]

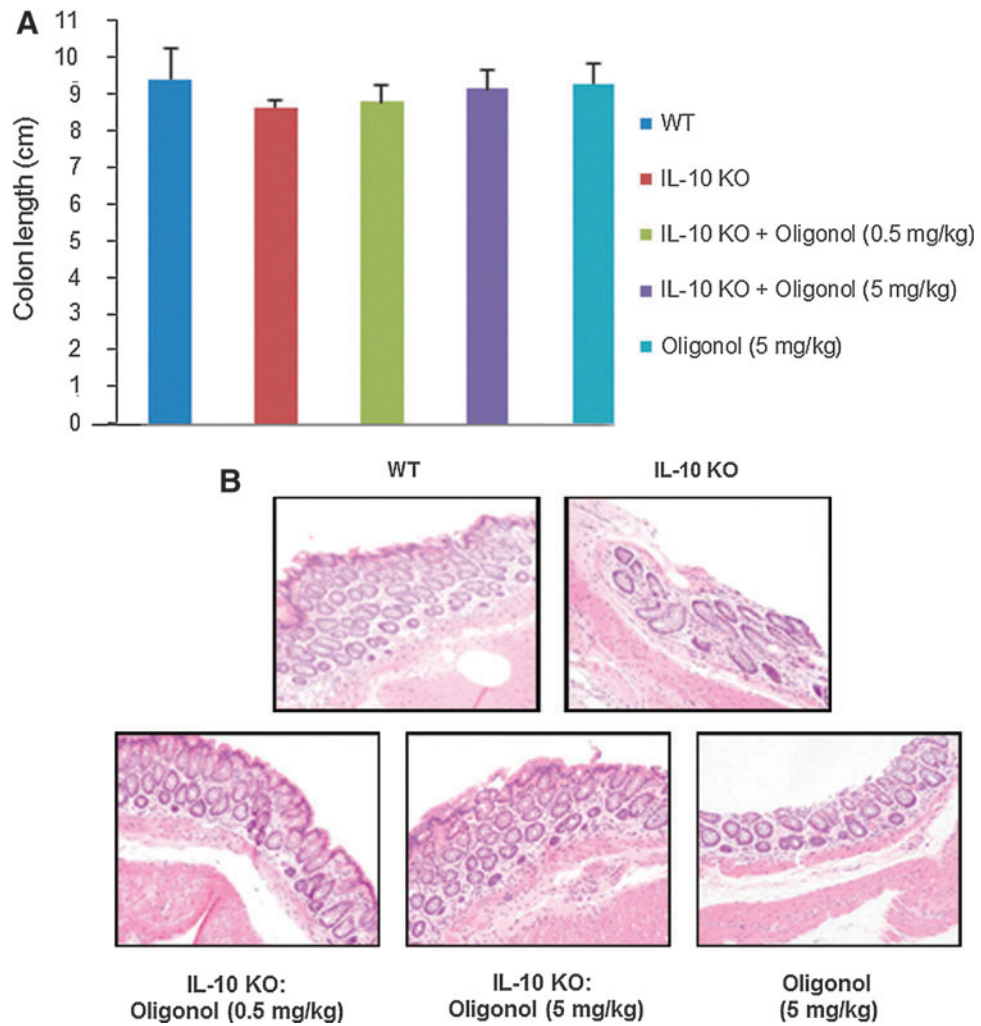

**SUPPLEMENTARY FIG. S3. Oligonol did not ameliorate pathological symptoms in a mouse IL-10 knockout (KO) colitis model. (A)** The comparison of the colon length at day 14. Results are expressed as means  $\pm$  SD ( $n=5$ , in each group). **(B)** Representative distal colon sections stained with H&E. Magnifications  $\times 200$ .
