# Supplementary material
Source: PubMed Central journal article supplement (PMC3689162)
Supplement: Supp_Fig4.pdf [file Supp_Fig4.pdf]

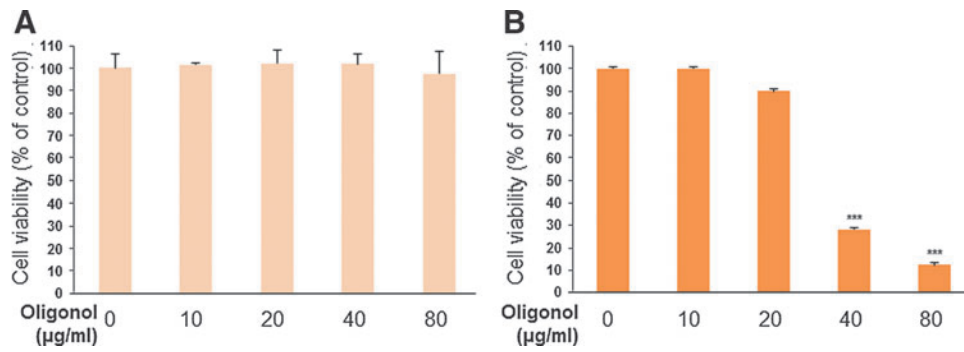

**SUPPLEMENTARY FIG. S4. Oligonol at concentration 10 and 20 µg/ml had no effect on RAW 246.7 and CCD841CoN cell viability.** (A) 3-(4,5-Dimethylthiazol-2-yl)-2,5-diphenyltetrazolium bromide (MTT) assay for measuring the toxicity of oligonol on RAW 246.7 cells. (B) MTT assay for measuring the toxicity of oligonol on CCD841CoN cells. Data represent three independent experiments ( $n=3$ ). Results are expressed as means  $\pm$  SD. \*\*\* $p < 0.001$ .
